# Supplementary material
Source: publisher figshare collection journal article supplement (https://acs.figshare.com/ndownloader/files/13061093)
Supplement: Supplementary file 1 [file 13061093]

## Supporting Information:

# The Solid Electrolyte Interphase (SEI) of Water-Processed Graphite Electrodes Examined in a 65 mAh Full Cell Configuration

F. Jeschull<sup>1,†,\*</sup>, J. Maibach<sup>1,‡</sup>, R. Félix<sup>2</sup>, M. Wohlfahrt-Mehrens<sup>3</sup>, K. Edström<sup>1</sup>, M. Memm<sup>3</sup>, D. Brandell<sup>1</sup>

<sup>1</sup>Department of Chemistry – Ångström Laboratory, Uppsala University, Lägerhyddsvägen 1, 75121 Uppsala, Sweden

<sup>2</sup>Renewable Energy, Helmholtz-Zentrum Berlin für Materialien und Energie GmbH, Hahn-Meitner-Platz 1, 14109 Berlin, Germany

<sup>3</sup>Zentrum für Solarenergie- und Wasserstoff-Forschung (ZSW), Lise-Meitner-Straße 24, 89081 Ulm, Germany

## 1. Galvanostatic Cycling of Samples

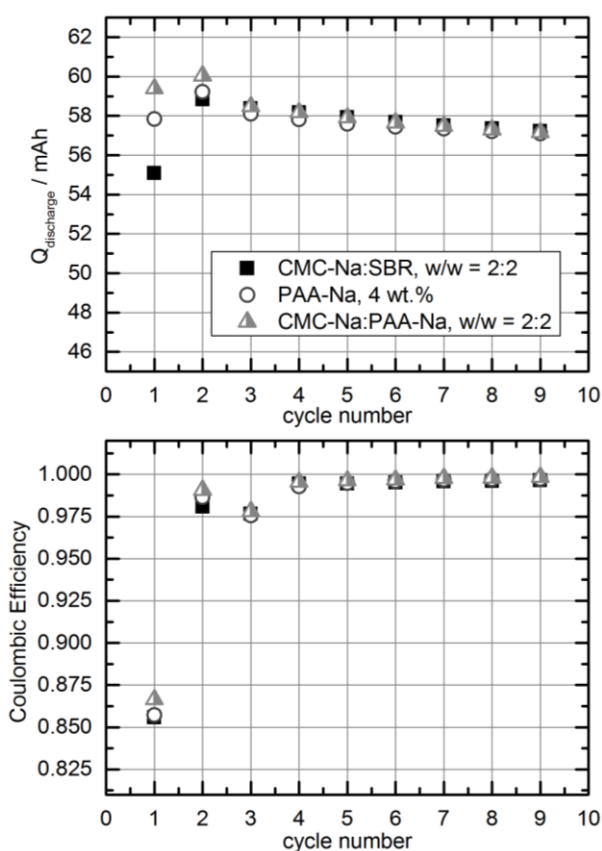

**Figure S1.** Discharge capacities (top) and corresponding Coulombic efficiencies (bottom) of graphite:LiFePO<sub>4</sub> lithium-ion batteries. The graphite electrodes contained 4 wt.% of PAA-Na binder (empty circles) or a binder blend of CMC-Na:SBR (2:2, filled squares) and CMC-Na:PAA-Na (2:2, triangles), respectively.

## 2. Relative atomic ratios (supplement to Fig. 4)

**Table S1.** Relative atomic concentrations in pristine, soaked and cycled electrodes in either of the three formulations.

| CMC:SBR |          |        |        |
|---------|----------|--------|--------|
| element | pristine | soaked | cycled |
| C       | 86.7     | 74.8   | 43.7   |
| O       | 11.9     | 10.0   | 20.6   |
| F       | 0.0      | 9.3    | 14.3   |
| P       | 0.0      | 1.0    | 2.1    |
| Na      | 1.3      | 0.2    | 0.0    |
| Li      | 0.0      | 4.8    | 19.3   |

| PAA-Na  |          |        |        |
|---------|----------|--------|--------|
| element | pristine | soaked | cycled |
| C       | 90.0     | 83.8   | 33.5   |
| O       | 7.8      | 5.7    | 26.0   |
| F       | 0.0      | 6.1    | 12.9   |
| P       | 0.0      | 0.6    | 2.7    |
| Na      | 2.2      | 0.1    | 0.6    |
| Li      | 0.0      | 3.7    | 24.3   |

| CMC:PAA |          |        |        |
|---------|----------|--------|--------|
| element | pristine | soaked | cycled |
| C       | 81.8     | 76.1   | 22.5   |
| O       | 15.5     | 11.9   | 13.3   |
| F       | 0.0      | 7.1    | 30.6   |
| P       | 0.0      | 1.1    | 1.9    |
| Na      | 2.7      | 0.2    | 0.4    |
| Li      | 0.0      | 3.6    | 31.3   |

### 3. Survey Spectra of Cycled Samples

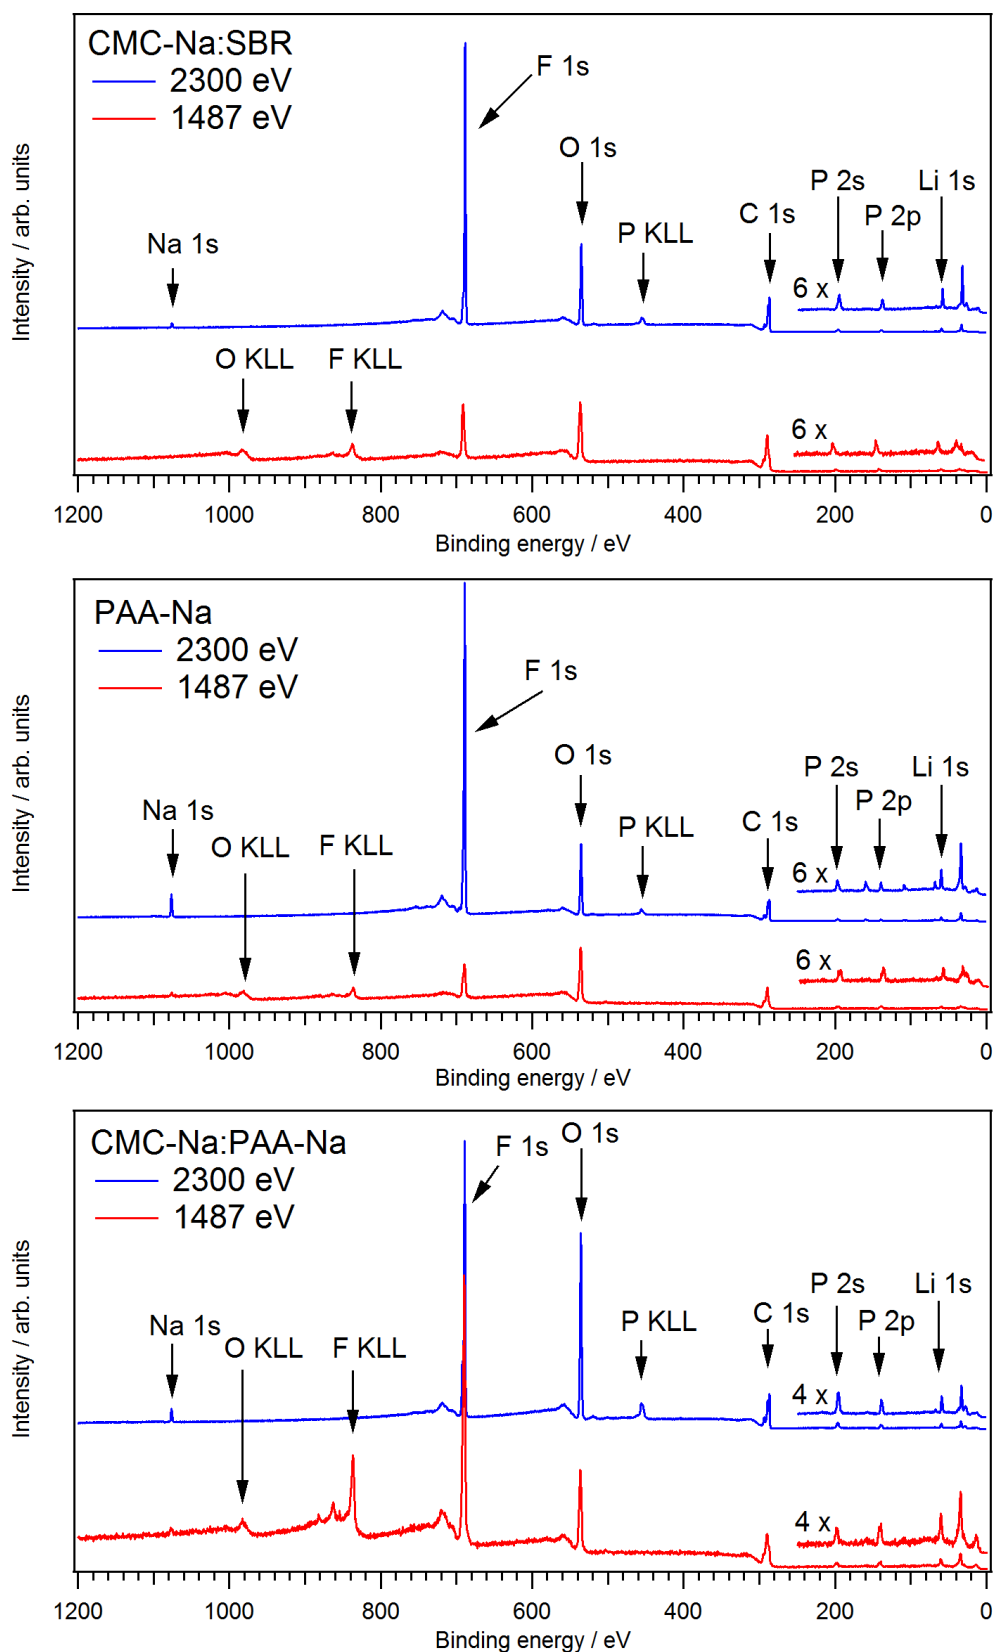

**Figure S2.** Survey spectra of the cycled graphite electrodes measured using excitation energies of 1487 eV and 2300 eV

### 3. Core level spectra of pristine, soaked and cycled samples

#### 3.1. Comparison: SMG-A3 graphite (powder vs. pristine graphite electrode with CMC:SBR binder)

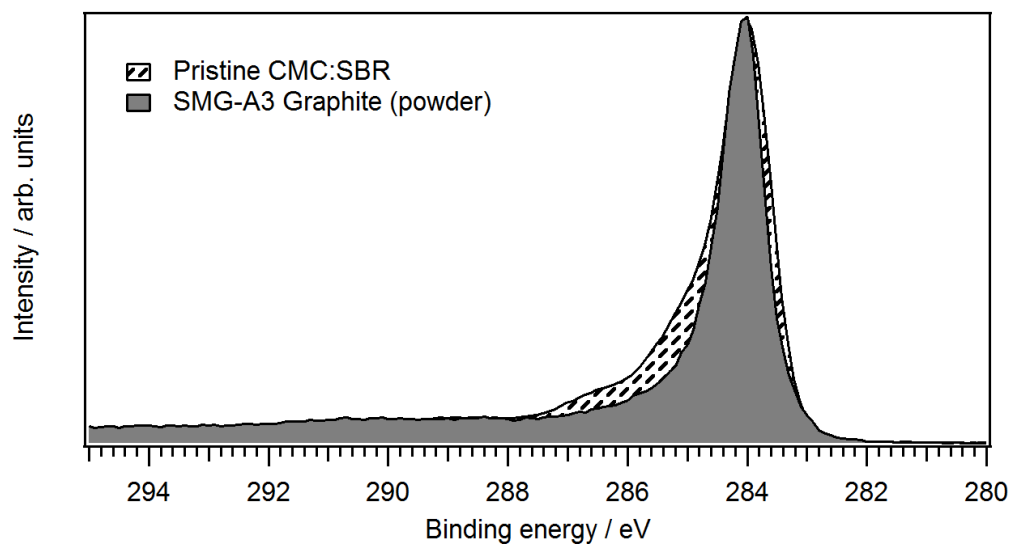

**Figure S3.** C 1s spectra of soaked and cycled samples of the CMC:SBR electrode formulation.

### 3.2. PES spectra of CMC-Na:SBR electrodes

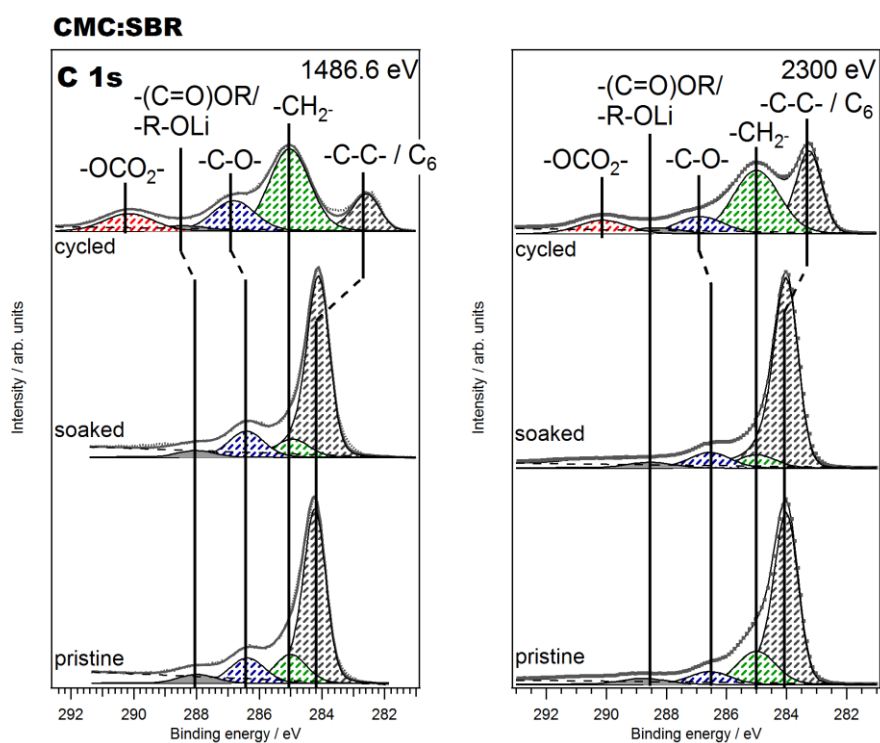

**Figure S4.** C 1s spectra of pristine, soaked and cycled samples of the CMC:SBR electrode formulation.

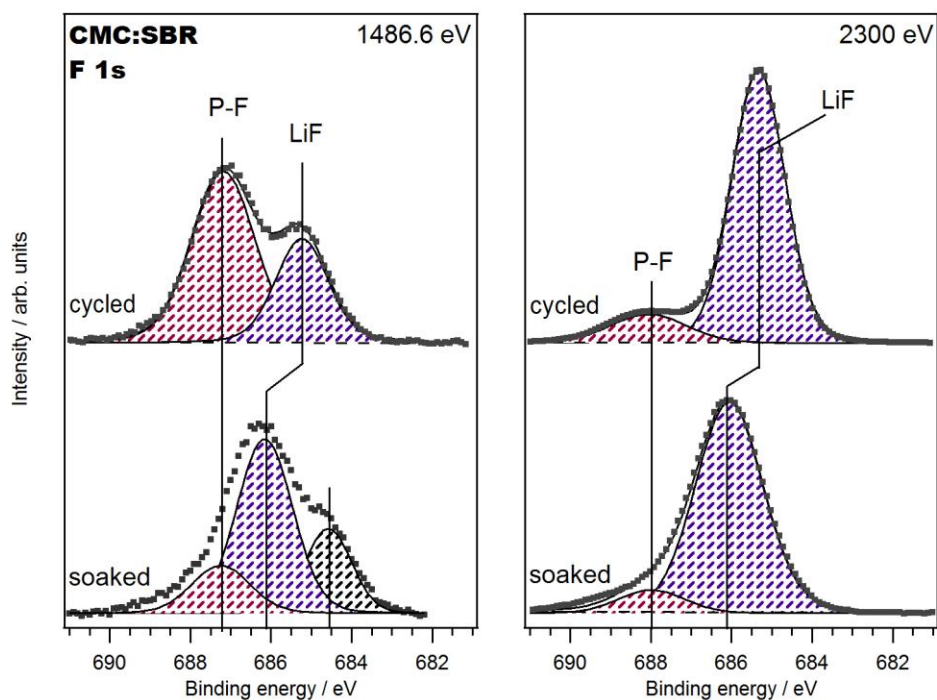

**Figure S5.** F 1s spectra of soaked and cycled samples of the CMC:SBR electrode formulation.

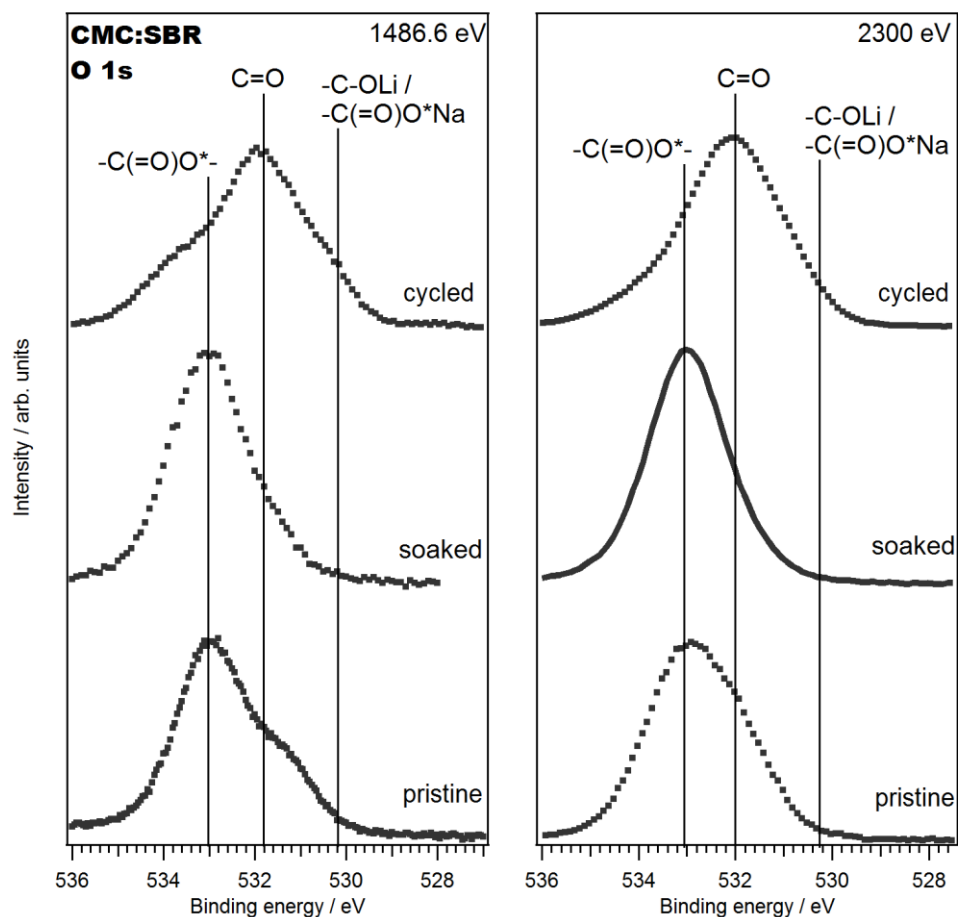

**Figure S6.** O 1s spectra of pristine, soaked and cycled samples of the CMC:SBR electrode formulation.

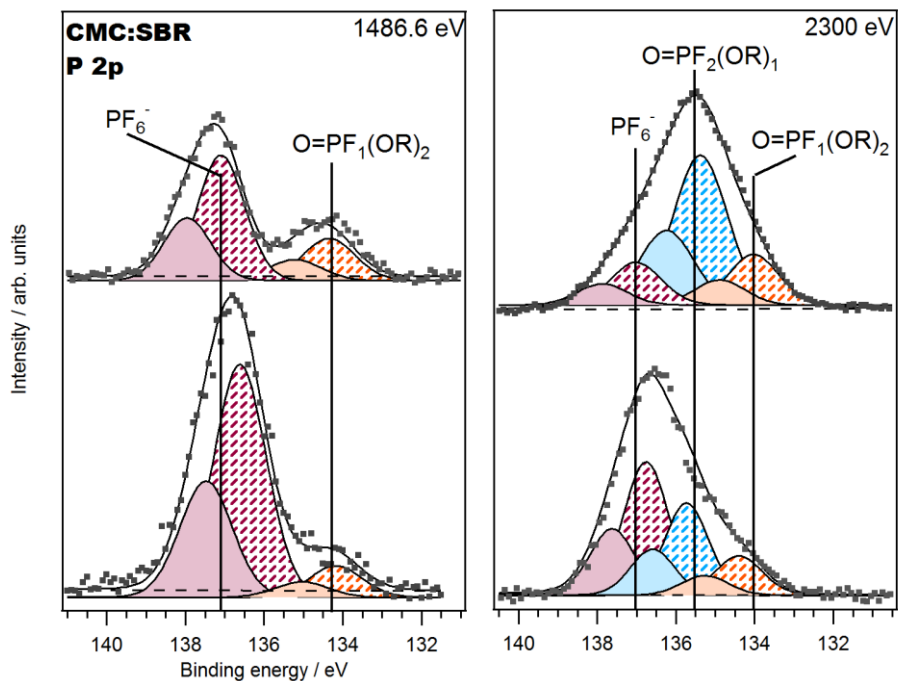

**Figure S7.** P 2p spectra of soaked and cycled samples of the CMC:SBR electrode formulation.

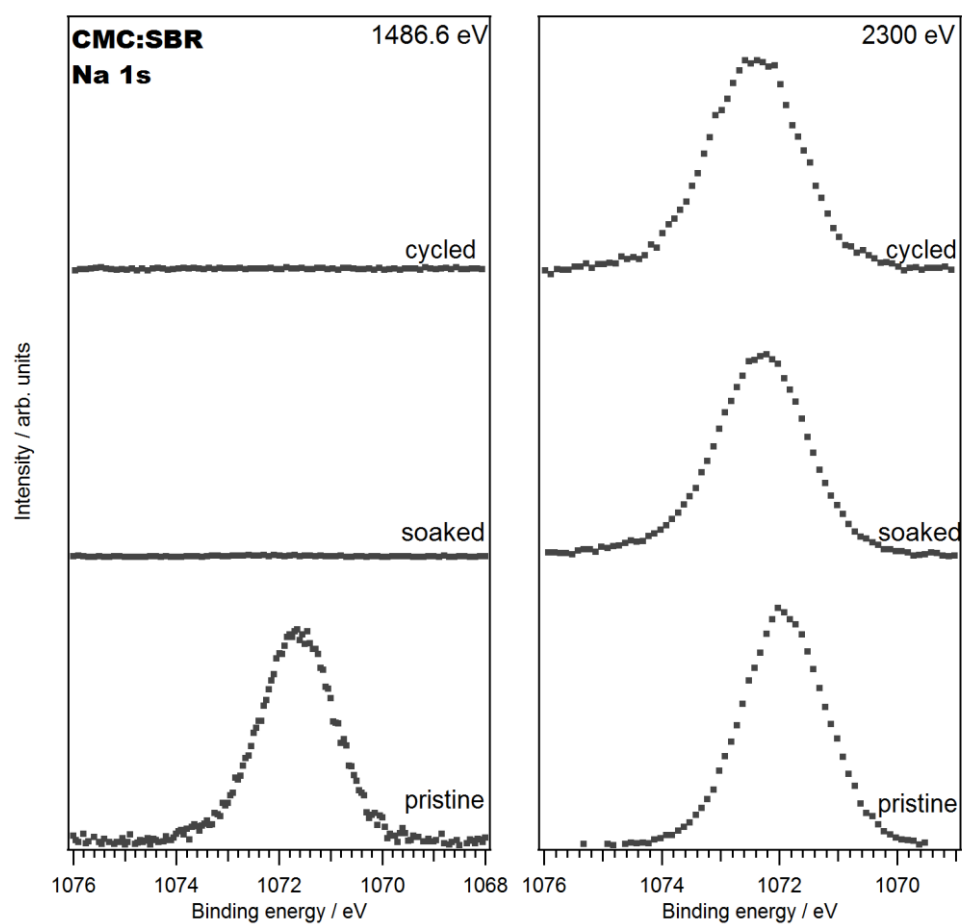

**Figure S8.** Na 1s spectra of pristine, soaked and cycled samples of the CMC:SBR electrode formulation.

### 3.3. PES spectra of PAA-Na electrodes

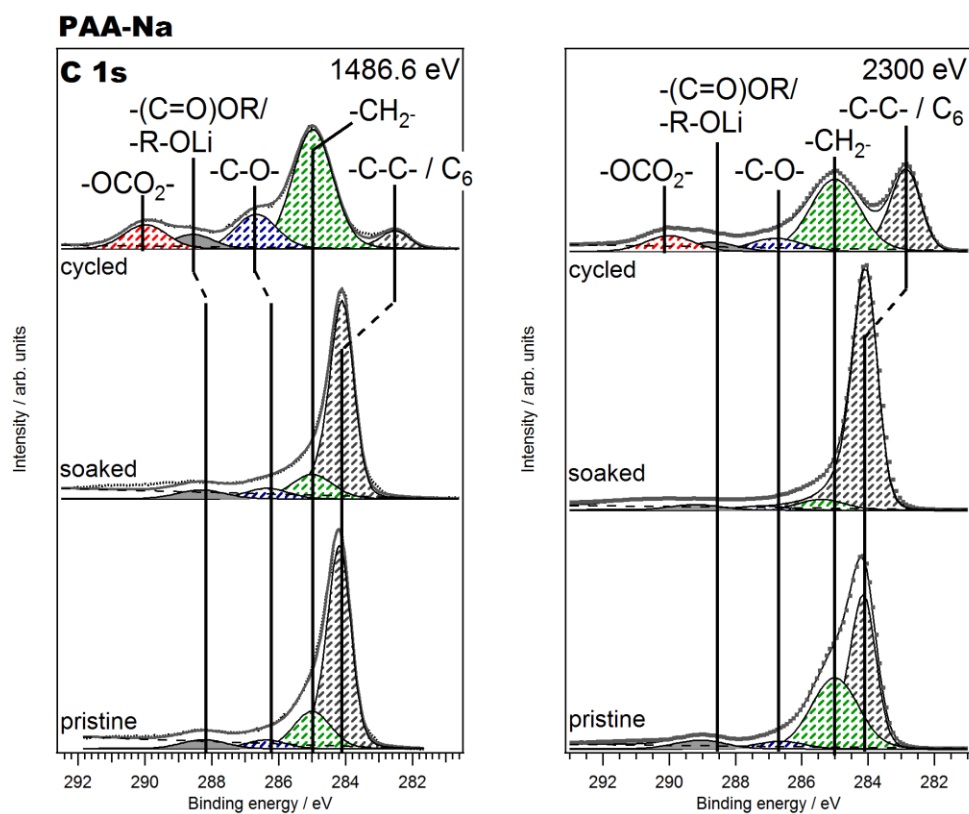

**Figure S9.** C 1s spectra of pristine, soaked and cycled samples of the PAA-Na electrode formulation.

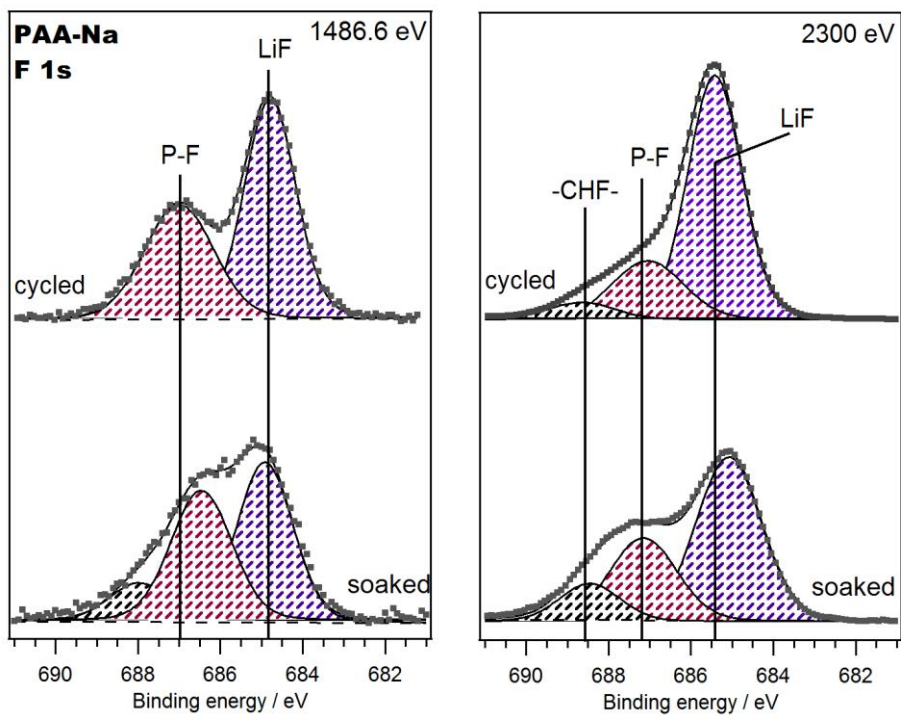

**Figure S10.** F 1s spectra of soaked and cycled samples of the PAA-Na electrode formulation.



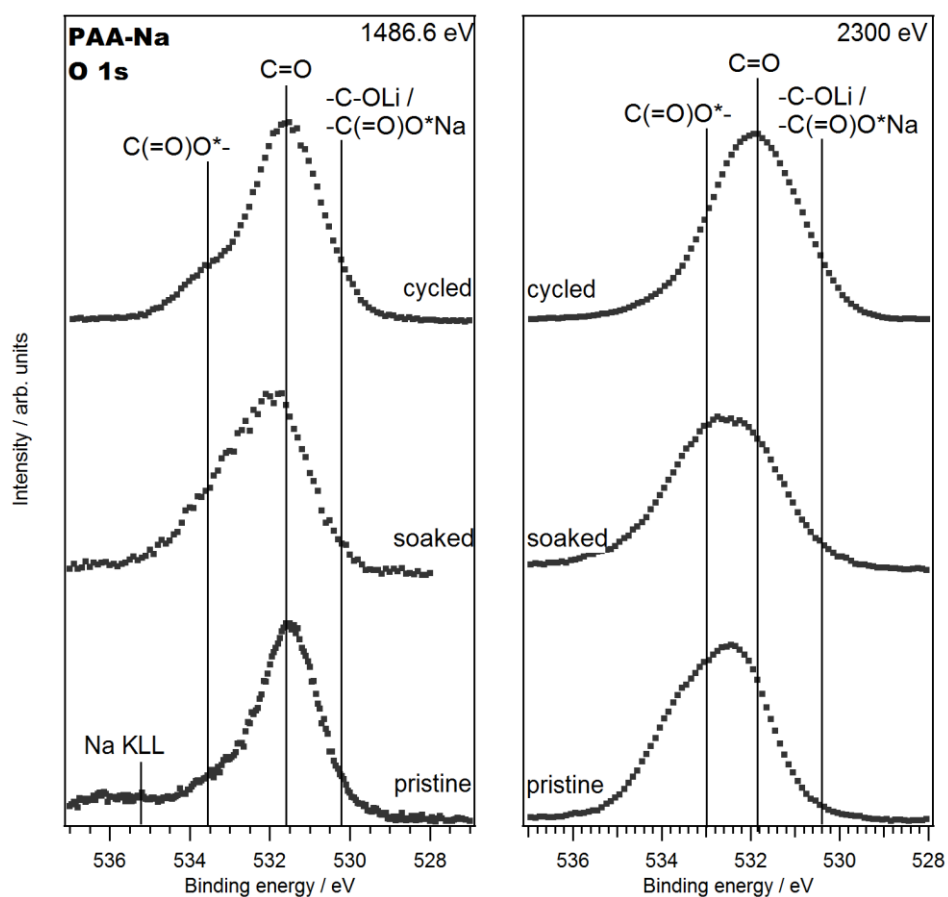

**Figure S11.** O 1s spectra of pristine, soaked and cycled samples of the PAA-Na electrode formulation.

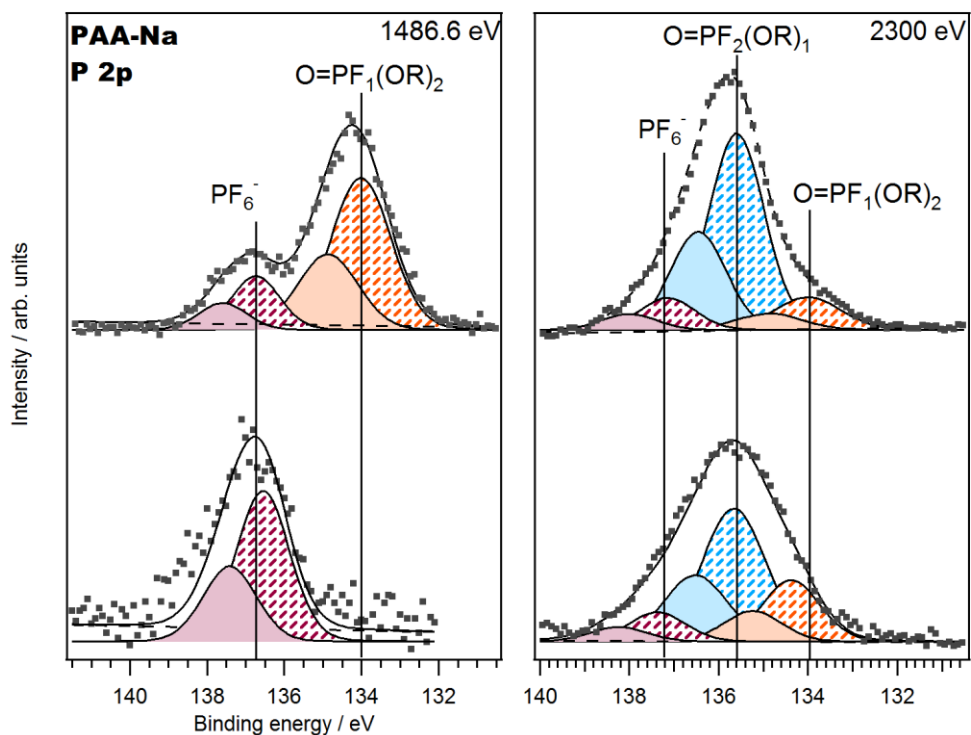

**Figure S12.** P 2p spectra of soaked and cycled samples of the PAA-Na electrode formulation.

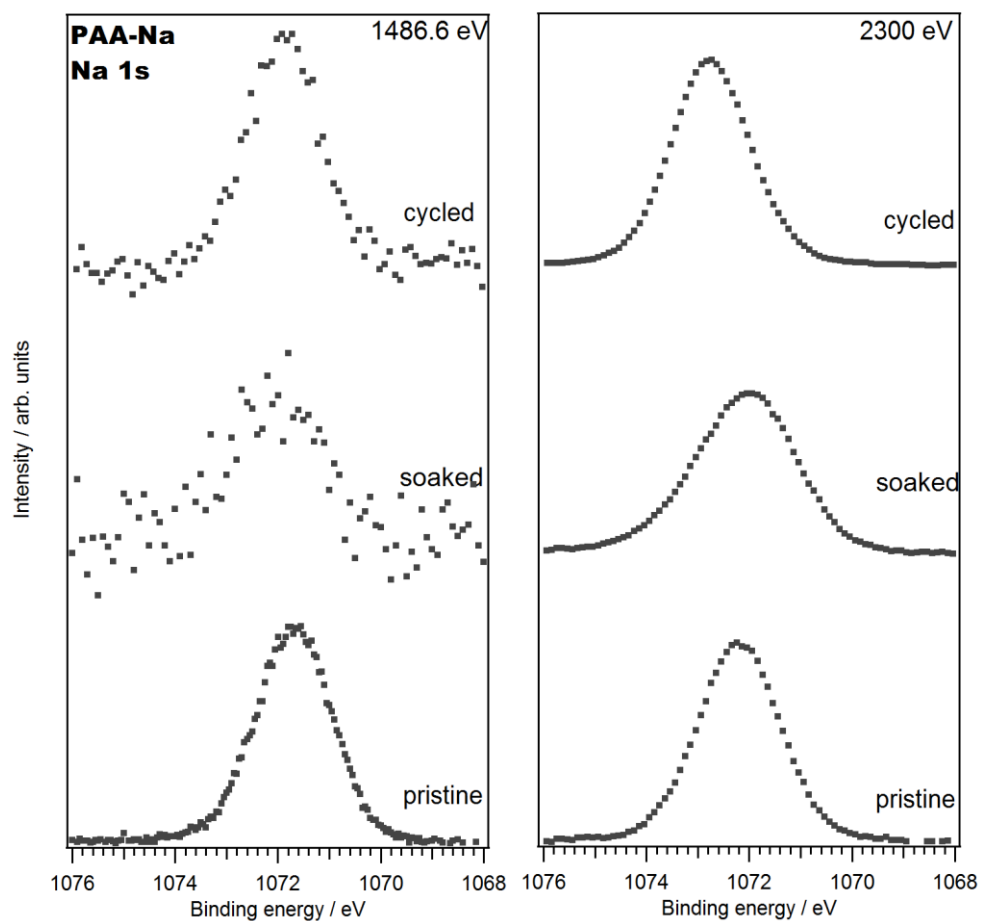

**Figure S13.** Na 1s spectra of pristine, soaked and cycled sample of the PAA-Na electrode formulation.

### 3.4. PES spectra of CMC:PAA electrodes

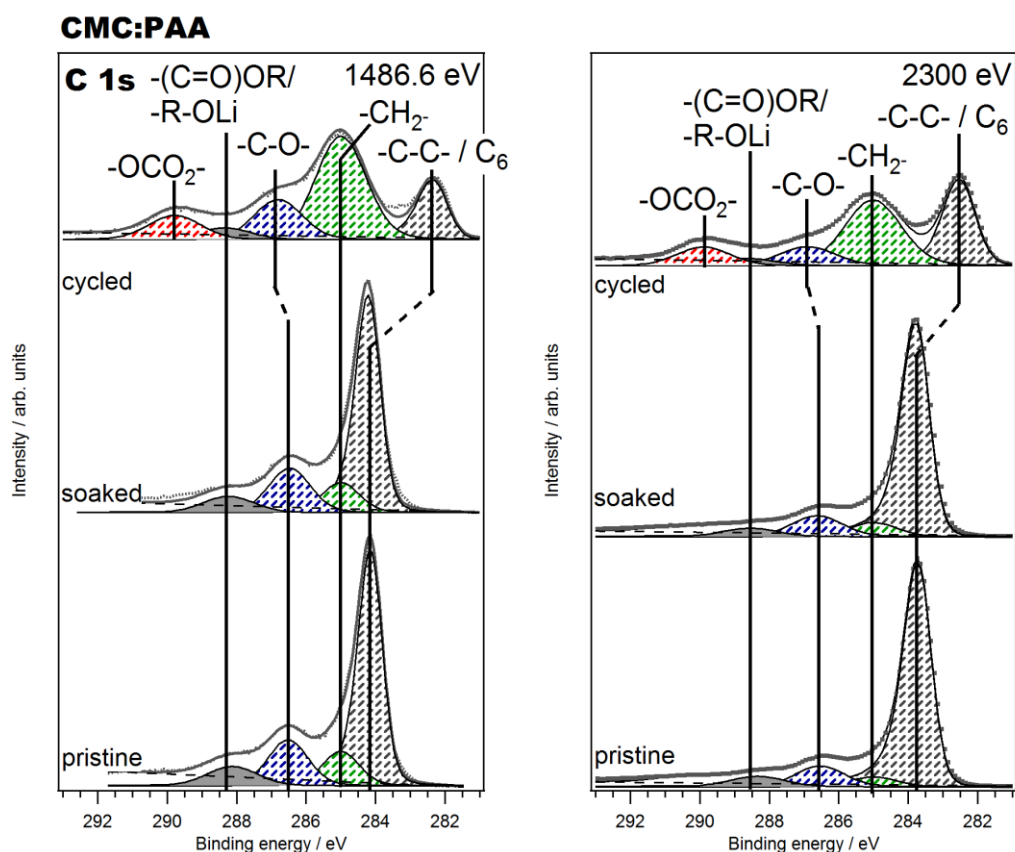

**Figure S14.** C 1s spectra of pristine, soaked and cycled samples of the CMC:PAA electrode formulation.

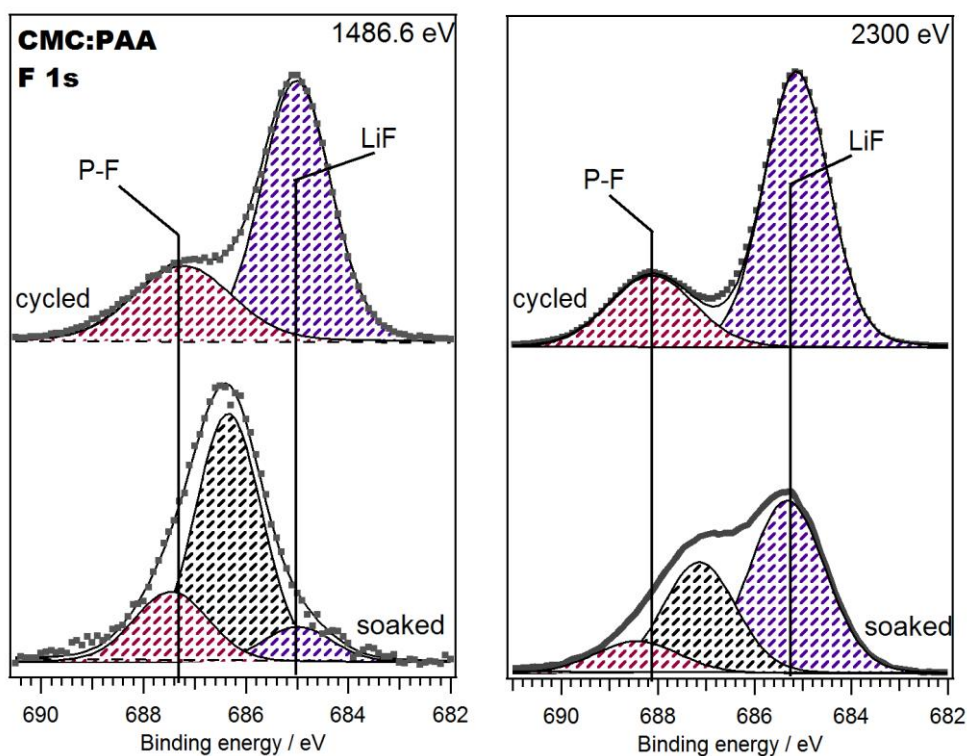

**Figure S15.** F 1s spectra of soaked and cycled samples of the CMC:PAA electrode formulation.

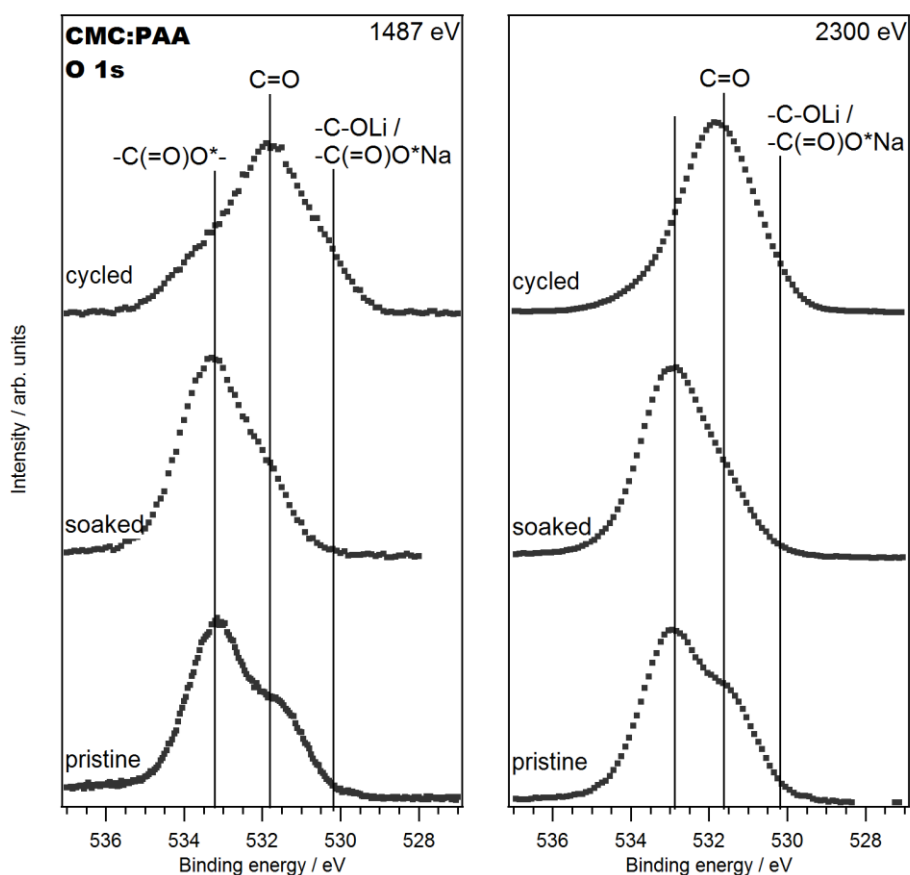

**Figure S16.** O 1s spectra of pristine, soaked and cycled samples of the CMC:PAA electrode formulation.

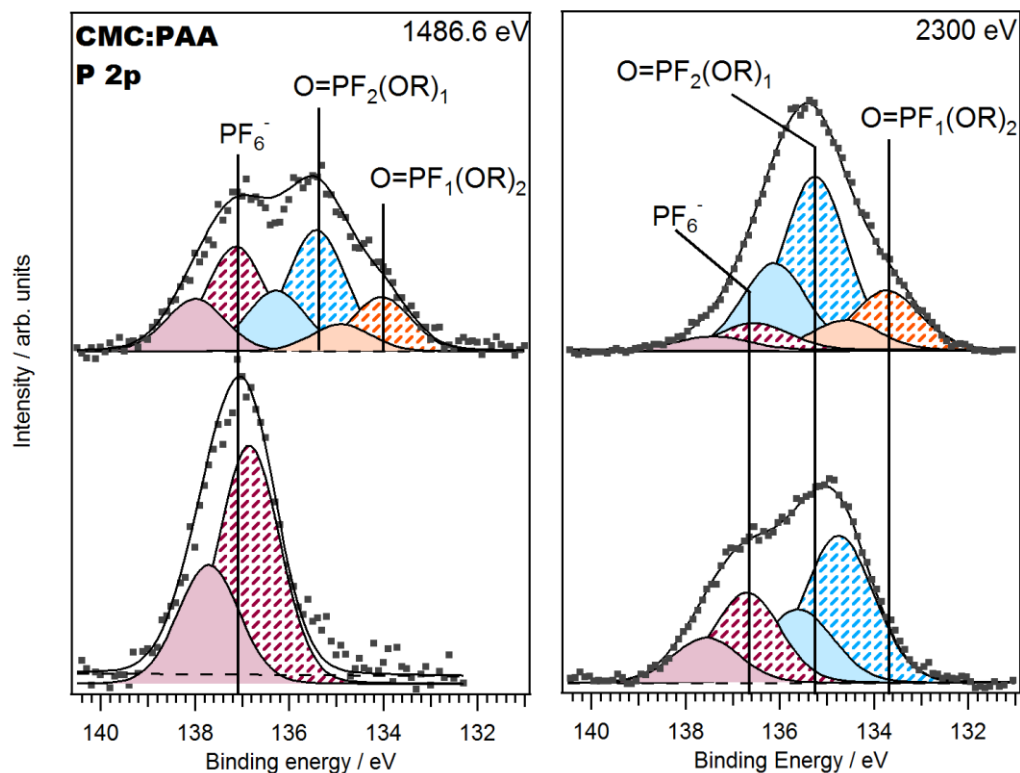

**Figure S17.** P 2p spectra of soaked and cycled samples of the CMC:PAA electrode formulation.

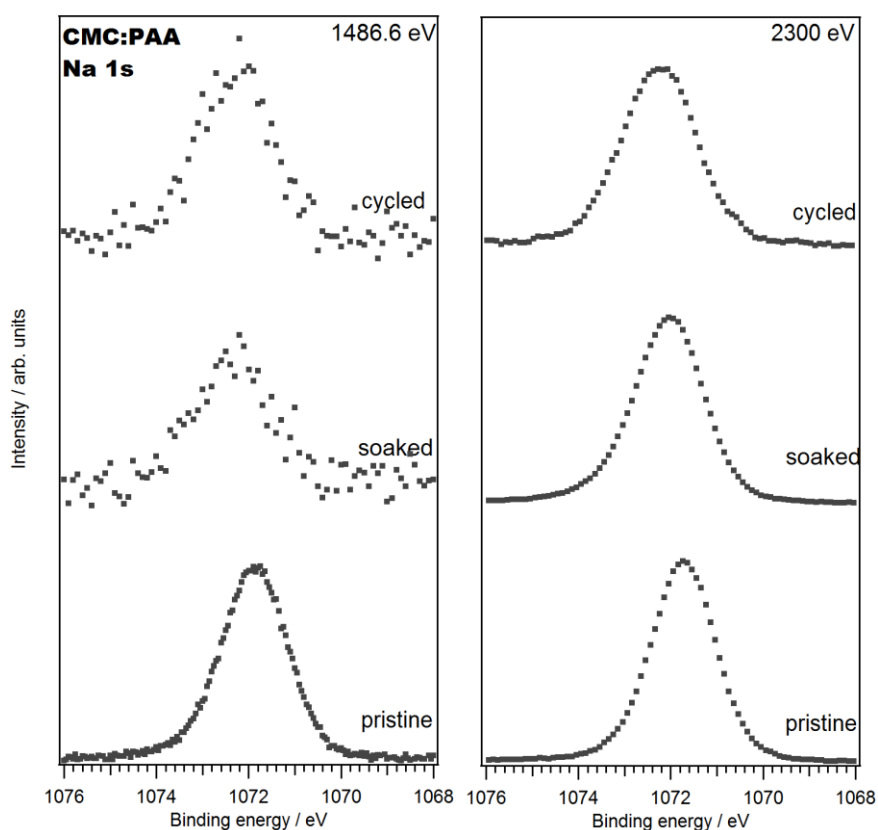

**Figure S18.** Na 1s spectra of pristine, soaked and cycled samples of the CMC:PAA electrode formulation.

### 3.5. Figure 4 enlarged

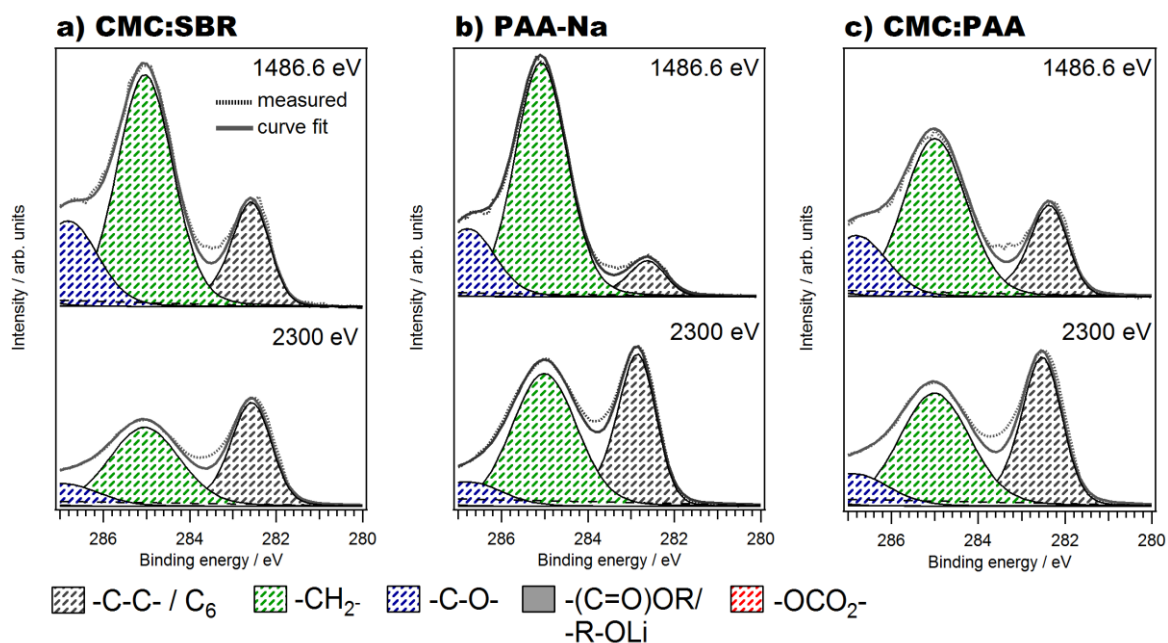

**Figure S19.** C 1s spectra for two different photon energies (top row: 1487 eV, bottom row: 2300 eV) of cycled electrodes containing 4 wt.% of CMC-Na:SBR (a), PAA-Na (b) and CMC-Na:PAA-Na (c), respectively. The spectra was enlarged around the hydrocarbon region.
